# Supplementary material for: Modeling ChIP Sequencing In Silico with Applications
Source: PubMed Central journal article supplement (PMC2507756; doi:10.1371/journal.pcbi.1000158), 2008-08-22
Supplement: pcbi.1000158.s001.pdf [file pcbi.1000158.s001.pdf]

## Modeling CHIP sequencing *in silico* with applications

Zhengdong D. Zhang, Joel Rozowsky, Michael Snyder, Joseph Chang, Mark Gerstein

**Supplementary table 2.** Publicly available CHIP-sequencing data sets and the number of sites identified using varying-background model.

| Data set               | Experimental outcome <sup>1</sup> |       |                  | Model parameters <sup>2</sup> |     | $n_{\text{site}}$ <sup>3</sup> |
|------------------------|-----------------------------------|-------|------------------|-------------------------------|-----|--------------------------------|
|                        | $l_r$                             | $l_t$ | $n_{\text{umr}}$ | $s$                           | $c$ |                                |
| <i>Robertson et al</i> |                                   |       |                  |                               |     |                                |
| STAT1 stim             | 27                                | 174   | 1,426,879        | 5                             | 10  | 28,434                         |
| STAT1 unstim           | 27                                | 174   | 1,179,413        | 5                             | 10  | 5,307                          |
| <i>Barski et al</i>    |                                   |       |                  |                               |     |                                |
| H3K4me1                | 24                                | 220   | 1,066,623        | 5                             | 15  | 94,073                         |
| H3K9me2                | 25                                | 220   | 721,504          | 10                            | 10  | 18,639                         |
| H3K27me3               | 25                                | 220   | 780,377          | 5                             | 5   | 29,451                         |

1.  $l_r$ , the read length;  $l_t$ , the tag length. Both are in base pairs.  
 $n_{\text{umr}}$ , the number of the uniquely mapped sequence reads.
2.  $s$ , the shape, and  $c$ , the scale, for the gamma distribution of the fitted varying-background model.
3.  $n_{\text{site}}$ , the number of sites identified at FDR < 0.05.
