# Supplementary material for: Modeling ChIP Sequencing In Silico with Applications
Source: PubMed Central journal article supplement (PMC2507756; doi:10.1371/journal.pcbi.1000158), 2008-08-22
Supplement: pcbi.1000158.s002.pdf [file pcbi.1000158.s002.pdf]

# Modeling ChIP sequencing *in silico* with applications

Zhengdong D. Zhang, Joel Rozowsky, Michael Snyder, Joseph Chang, Mark Gerstein

**Supplementary table 1.** The goodness of fit between the simulated and the actual curves. <sup>1</sup>

|             |             | Background                |                    |                           |                    |
|-------------|-------------|---------------------------|--------------------|---------------------------|--------------------|
|             |             | Uniform                   |                    | Varying                   |                    |
| Among sites | Uniform     | A                         |                    | B                         |                    |
|             |             | Enrichment coef. <i>t</i> | Mean squared error | Enrichment coef. <i>t</i> | Mean squared error |
|             |             | 5                         | 1.586998897        | 5                         | 0.990667305        |
|             |             | 10                        | 0.863164925        | 10                        | 0.889633664        |
|             |             | 12                        | 0.725042018        | 12                        | 0.771627405        |
|             | 15          | 0.754559600               | 15                 | 0.679462299               |                    |
|             | 20          | 0.629474980               | 20                 | 0.484540718               |                    |
|             | Average     | 0.911848                  | Average            | 0.7631863                 |                    |
|             | Varying     | C                         |                    | D                         |                    |
|             |             | Enrichment coef. <i>t</i> | Mean squared error | Enrichment coef. <i>t</i> | Mean squared error |
| 5           |             | 0.353800760               | 5                  | 0.239834829               |                    |
| 10          |             | 0.092974392               | 10                 | 0.004265812               |                    |
| 12          |             | 0.090004782               | 12                 | 0.007199094               |                    |
| 15          | 0.103924481 | 15                        | 0.021765468        |                           |                    |
| 20          | 0.131689485 | 20                        | 0.042511183        |                           |                    |
| Average     | 0.1544788   | Average                   | 0.06311528         |                           |                    |

1. See Figure 4 for the corresponding curves in each panel.
